# Supplementary material for: Correction to: Integrative proteomics highlight presynaptic alterations and c-Jun misactivation as convergent pathomechanisms in ALS
Source: PubMed Central journal article supplement (PMC10564658; doi:10.1007/s00401-023-02630-9), 2023-09-12
Supplement: 401_2023_2630_MOESM1_ESM.pdf [file 401_2023_2630_MOESM1_ESM.pdf]

# **Integrative proteomics highlight presynaptic alterations and c-Jun misactivation as convergent pathomechanisms in ALS**

Amr Aly<sup>1,\*</sup>, Zsofia I. Laszlo<sup>2,\*</sup>, Sandeep Rajkumar<sup>1</sup>, Tugba Demir<sup>1</sup>, Nicole Hindley<sup>2</sup>, Douglas J. Lamont<sup>3</sup>, Johannes Lehmann<sup>1</sup>, Mira Seidel<sup>1</sup>, Daniel Sommer<sup>1</sup>, Mirita Franz-Wachtel<sup>4</sup>, Francesca Barletta<sup>5</sup>, Simon Heumos<sup>5,6</sup>, Stefan Czemmel<sup>5</sup>, Edor Kabashi<sup>7</sup>, Albert Ludolph<sup>8,9</sup>, Tobias M. Boeckers<sup>1,9</sup>, Christopher M. Henstridge<sup>2,†</sup>, Alberto Catanese<sup>1,9,†</sup>

1 Institute of Anatomy and Cell Biology, Ulm University, Ulm, Germany

2 Division of Cellular and Systems Medicine, School of Medicine, University of Dundee, Dundee, Scotland, UK

3 FingerPrints Proteomics Facility, Discovery Centre, School of Life Sciences, University of Dundee, Dundee, Scotland, UK

4 Proteome Center Tübingen, University of Tübingen, 72076, Tübingen, Germany.

5 Quantitative Biology Center (QBiC), University of Tübingen, 72076, Tübingen, Germany.

6 Biomedical Data Science, Dept. of Computer Science, University of Tübingen, 72076, Tübingen, Germany

7 Laboratory of Translational Research for Neurological Disorders, Imagine Institute, Université de Paris, INSERM UMR 1163, 75015, Paris, France.

8 Department of Neurology, Ulm University School of Medicine, Ulm, Germany

9 German Center for Neurodegenerative Diseases (DZNE), Ulm site

\* co-first author

† co-corresponding author

Correspondence to:

Dr. Christopher Henstridge

Email: [c.henstridge@dundee.ac.uk](mailto:c.henstridge@dundee.ac.uk)

Tel: +44 (0)1382 388676

Dr. Alberto Catanese

Email: [alberto.catanese@uni-ulm.de](mailto:alberto.catanese@uni-ulm.de)

Tel: +49 (0)731 50023213

**Supplementary Figures 1-25**

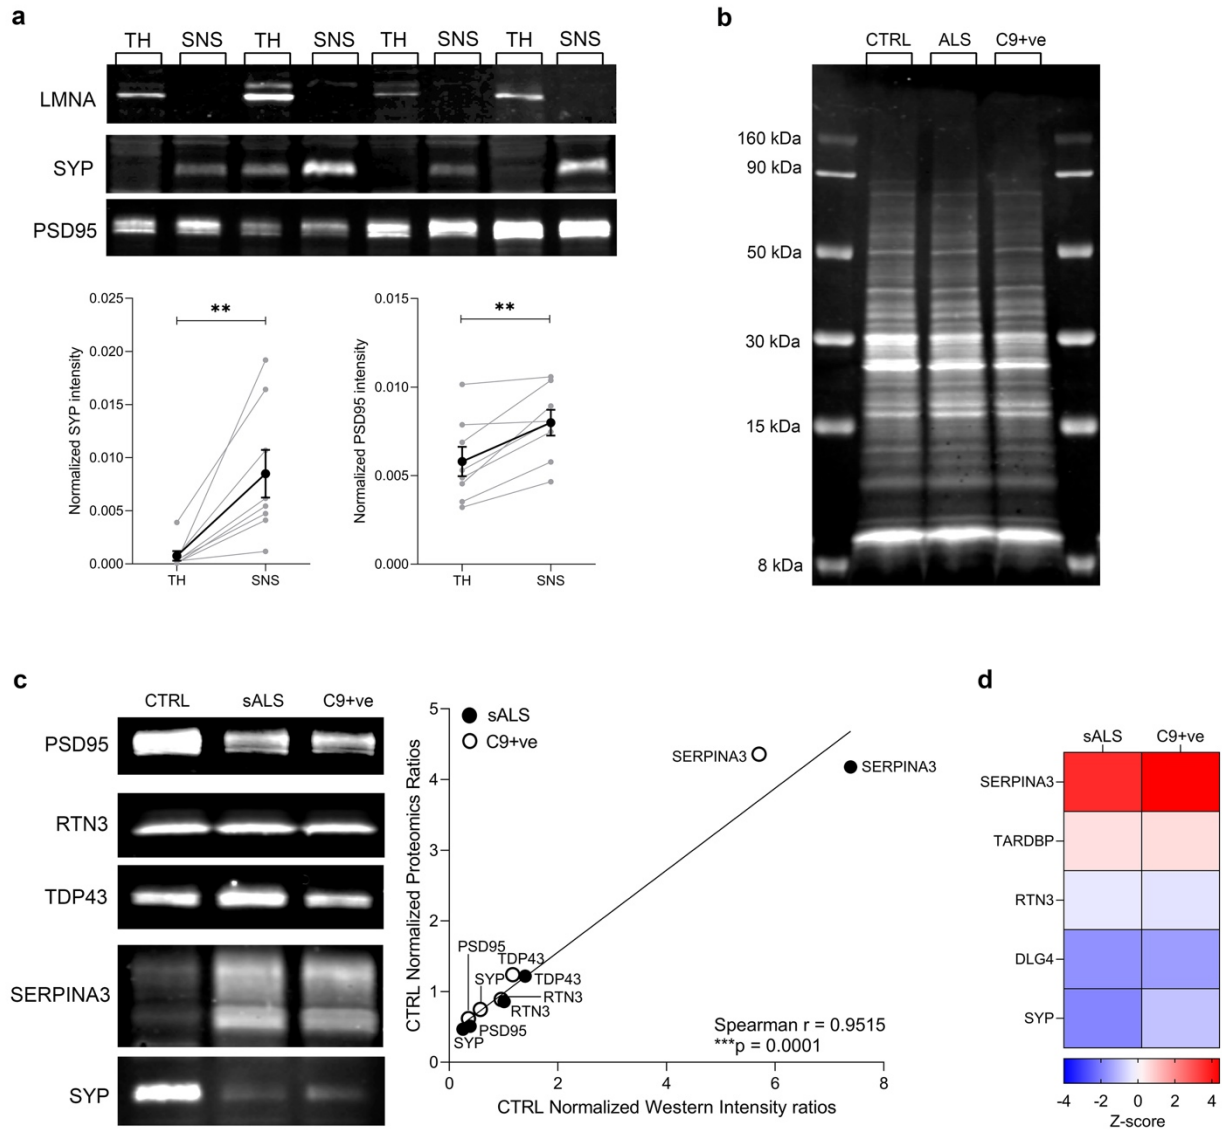

**Supplementary Fig. 1** Western blot validation of synaptically-enriched fractions from *post-mortem* samples. **a** Western blot from control samples confirm exclusion of nuclear protein (lamin) and enrichment of synaptic proteins (SYP and PSD95) in synaptoneurosome (SNS) compared to total homogenate (TH) fractions. Graphs show mean $\pm$ SEM analysed by Paired t-test in case of PSD95 \*\* $p=0.0036$  and Wilcoxon test in case of SYP \*\* $p=0.0078$ . **b** Total protein stain demonstrate the quality of samples used for further proteomics analysis. **c** Representative western blot images using the pooled samples shows significant correlation with proteomics results. Control normalized western blot intensity values were plotted against proteomics control normalized ratiometric values. Spearman correlation \*\*\* $p=0.0001$ ,  $r=0.9515$ . **d** Heatmap representation of the used proteins

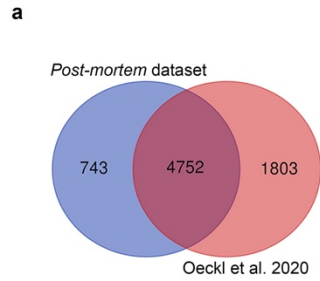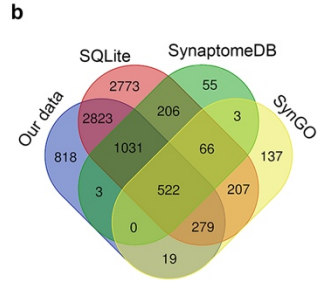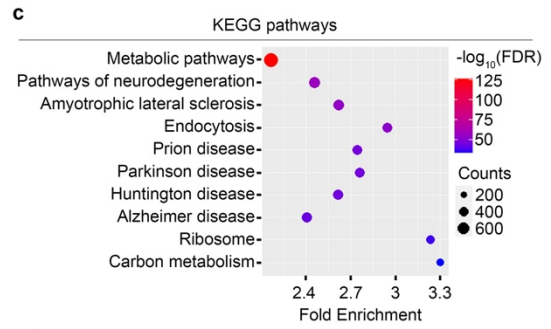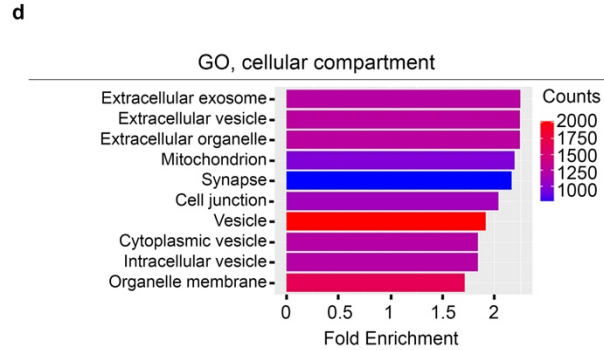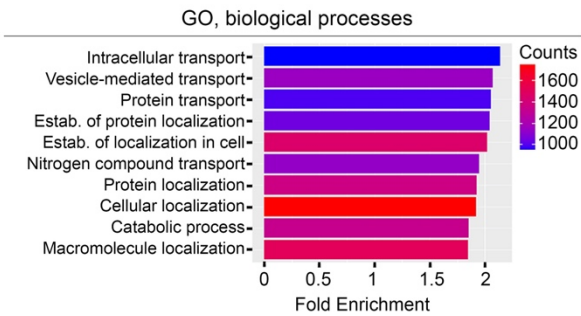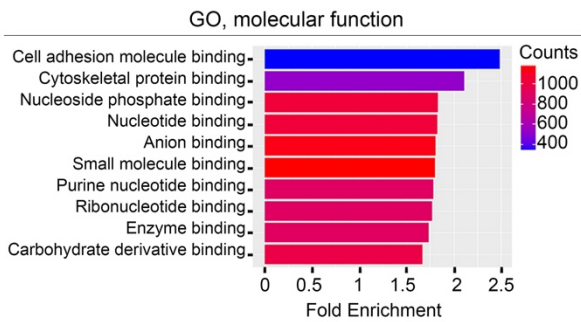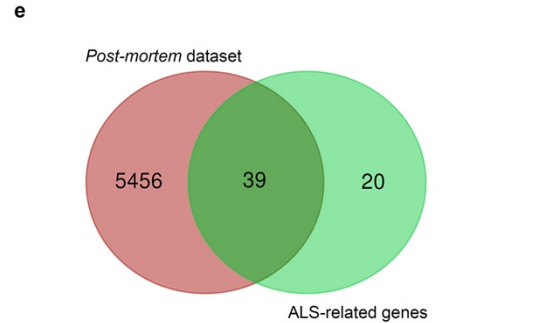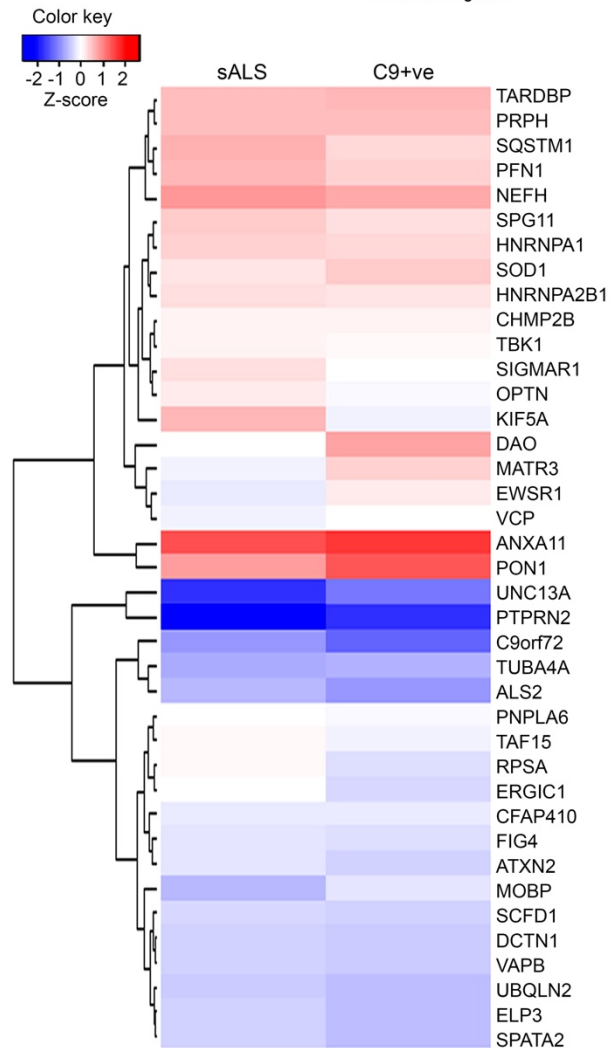

**Supplementary Fig. 2** Bioinformatics validation of the *post-mortem* synaptic proteome. **a** The identified 5495 unique ID shows 86% overlap with previously published human spinal cord dataset. **b** 85% of our dataset provide alignment with different synaptic databases validating the composition of the synaptic fractions. **c-d** Enrichment analysis was performed using the overall dataset, KEGG pathways and Gene Ontology (GO) terms were plotted using the top 10 terms plotted by fold enrichment,  $-\log_{10}(\text{FDR})$  (**c**) and gene count (**d**). **e** Venn diagram displays 39 ALS-related gene products were found in our synaptically-enriched fraction. The expression of the 39 ALS-specific genes were visualized by heatmap using hierarchical clustering with Euclidean distance

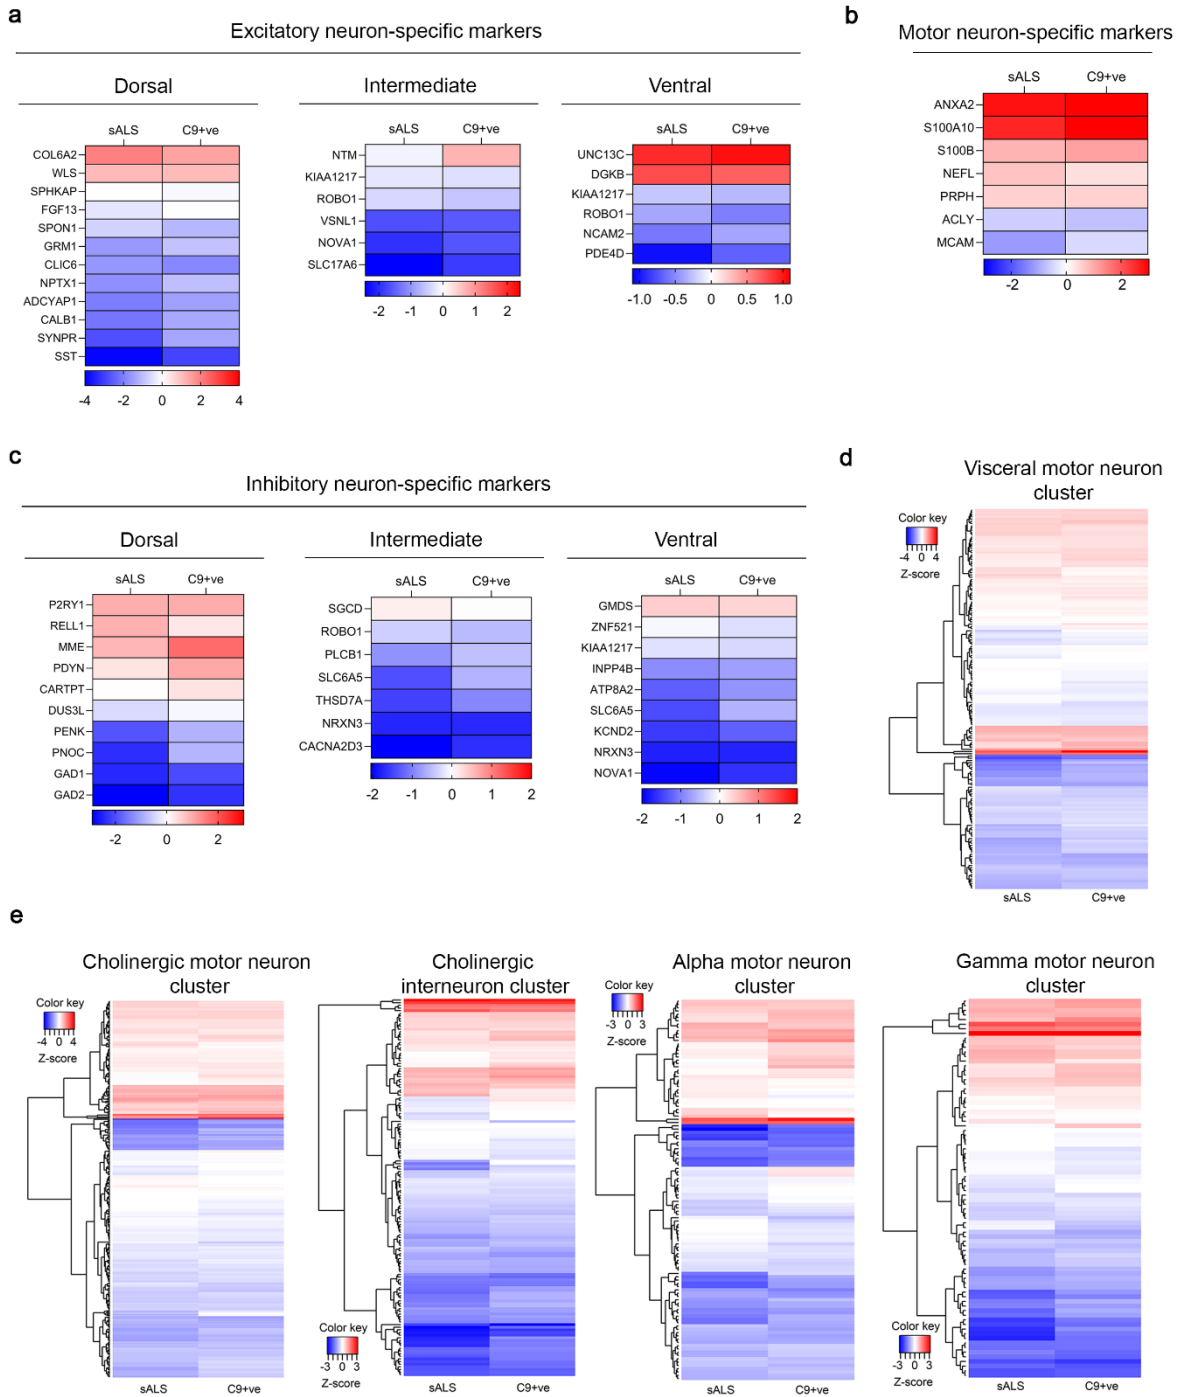

**Supplementary Fig. 3** Cell type-specific enrichment analysis of the *post-mortem* dataset. **a-c** Region- and cell type-specific protein clusters were plotted using the cellular taxonomy of the human spinal cord. **d-e** Motor neuron subtype-specific clusters were initially identified by Blum *et al.* 2021 [8] and aligned with our synaptic *post-mortem* dataset. Heatmap was created using hierarchical clustering with Euclidean distance.

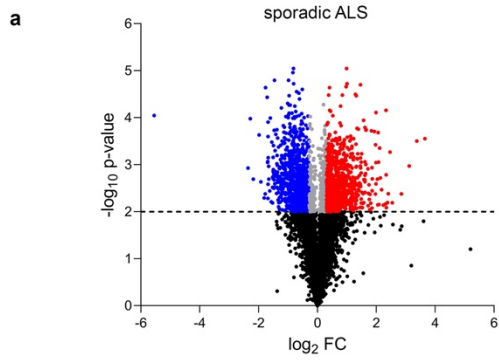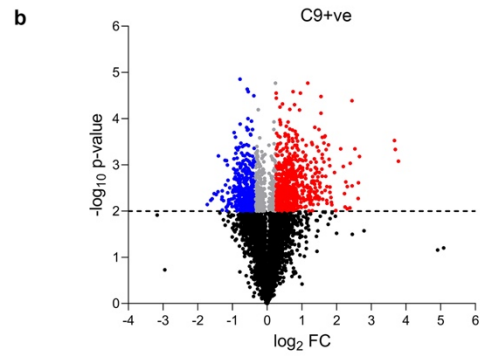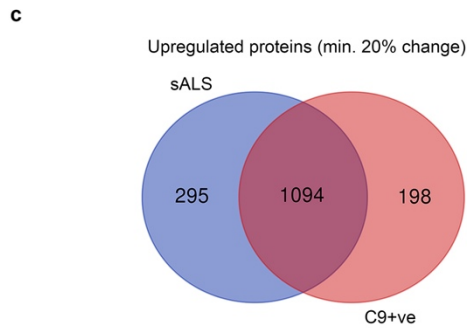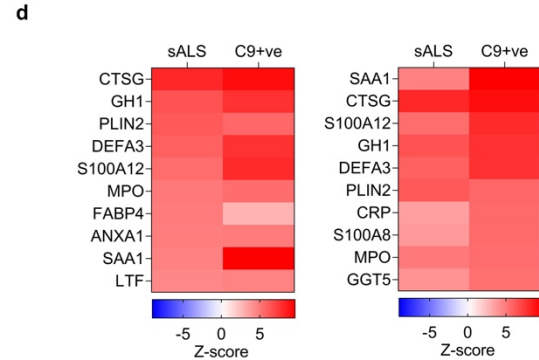

**e** sALS-specific protein enrichment

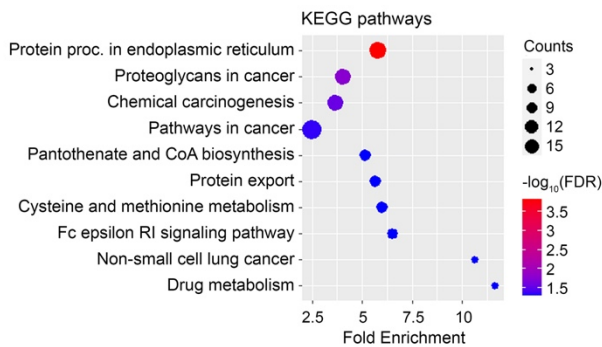

**f** C9+ve-specific protein enrichment

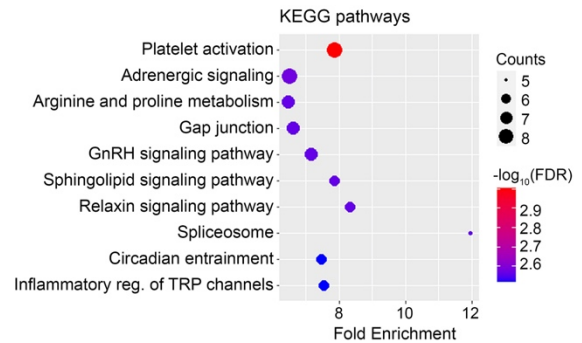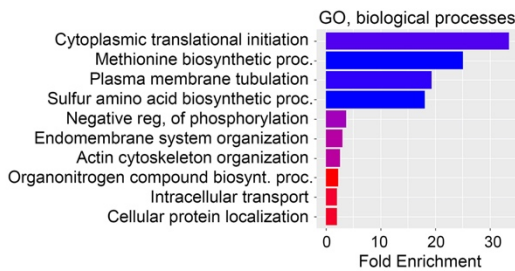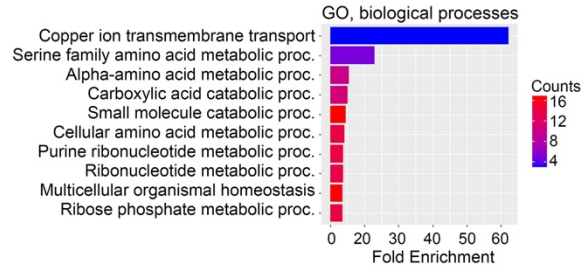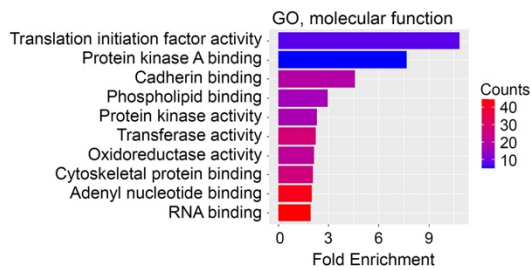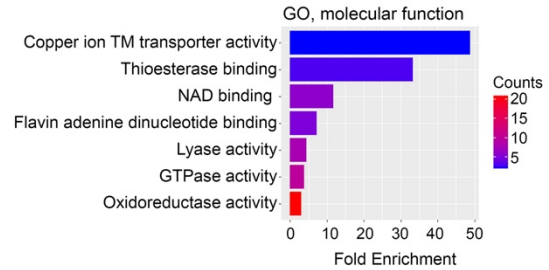

**Supplementary Fig. 4** ALS subtype-specific enrichment analysis of the upregulated proteins. **a-b** Volcano plots represent the protein distribution in sALS (**a**) and C9+ve samples (**b**) using  $\log_2$  fold change and  $-\log_{10}$  p value per protein. Significant changes were determined using  $2 \leq$  threshold for  $-\log_{10}$  p value and  $0.3 \leq$  for upregulated and  $0.3 \geq$  for downregulated proteins. **c** Venn diagram shows the number of ALS-subtype specific upregulated proteins. **d** Top 10 upregulated proteins specifically changed in the sporadic and C9+ve groups. **e** sALS-specific enrichment analysis shows the top 10 KEGG pathways and Gene Ontology terms. **f** C9+ve-specific upregulated proteins were used to perform enrichment analysis. Plots were created and colorized based on fold enrichment, gene count per pathway and  $-\log_{10}(\text{FDR})$ .

a

Downregulated proteins (min. 20% change)

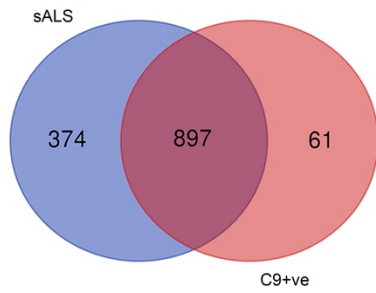

b

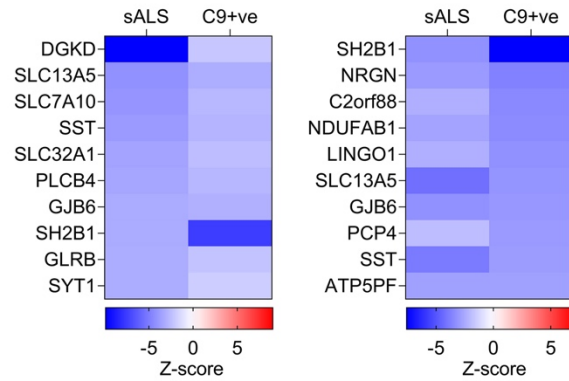

c

### sALS-specific protein enrichment

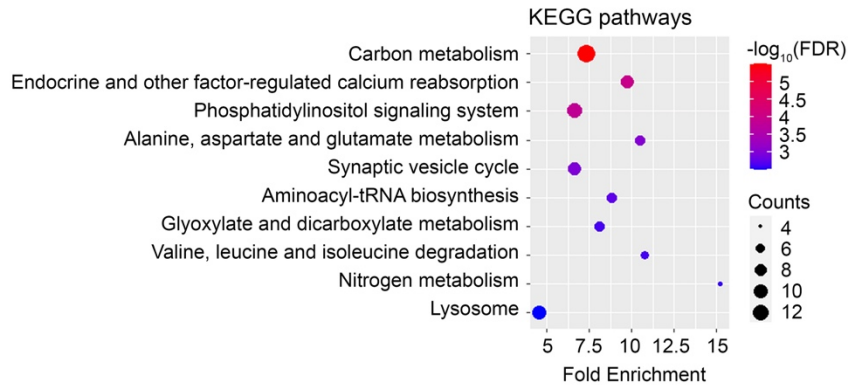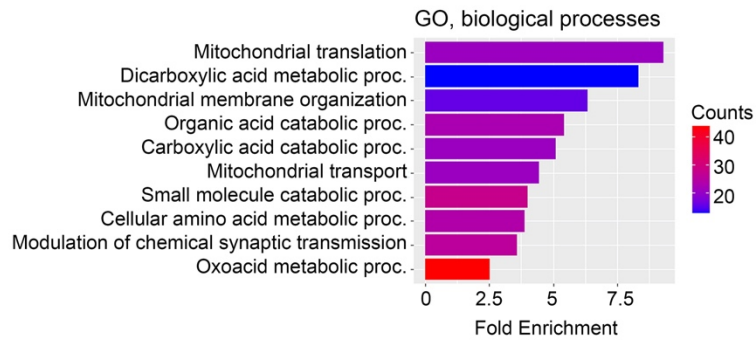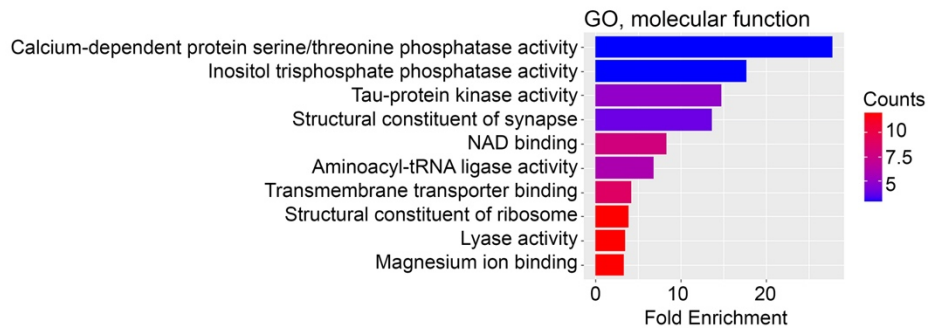



**Supplementary Fig. 5** ALS subtype-specific enrichment analysis of the downregulated proteins. **a** Venn diagram shows the alignment of the downregulated protein clusters from both ALS groups. **b** Subtype-specific top 10 downregulated proteins visualized by heatmap. **c** sALS-specific downregulated proteins were used to perform enrichment analysis. The top 10 KEGG pathways and Gene Ontology (GO) terms were plotted and colored based on fold enrichment, gene count per pathway and  $-\log_{10}(\text{FDR})$ . The C9+ve-specific downregulated protein cluster (61) did not show any kind of specific term enrichment

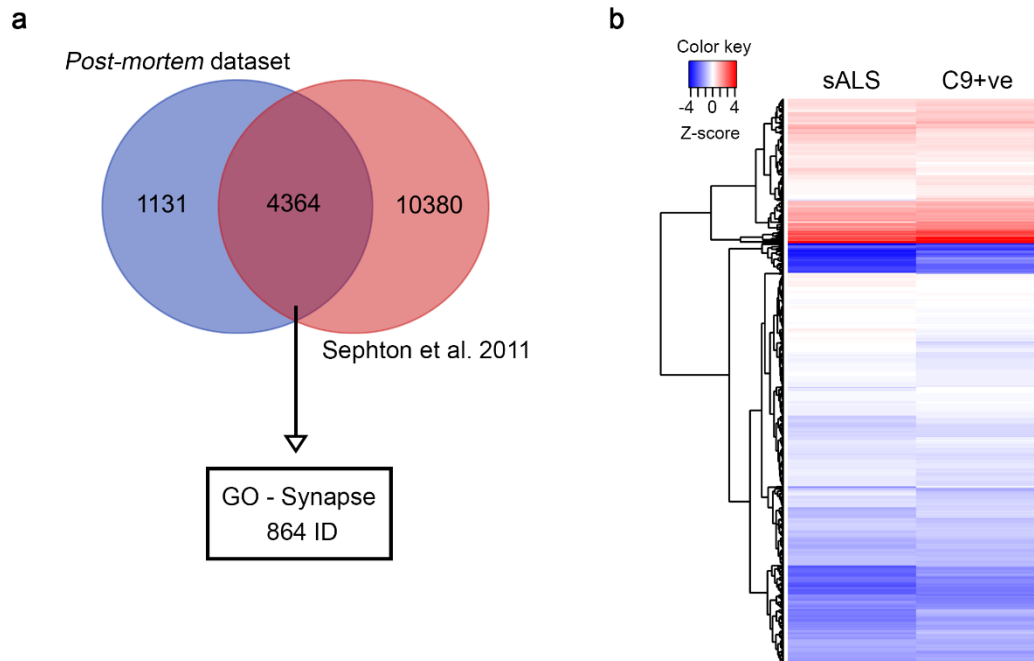

**Supplementary Fig. 6** Selection of synaptic TDP43 interactors. **a** Venn diagram displays the alignment of the *post-mortem* dataset with the TDP43 interactome from the Sephton *et al.* 2011 study [69]. Based on the Gene Ontology term „Synapse” 864 protein IDs were identified as synaptic proteins. **b** Expression of the synaptic interactors of TDP43 was plotted using hierarchical clustering with Euclidean distance.

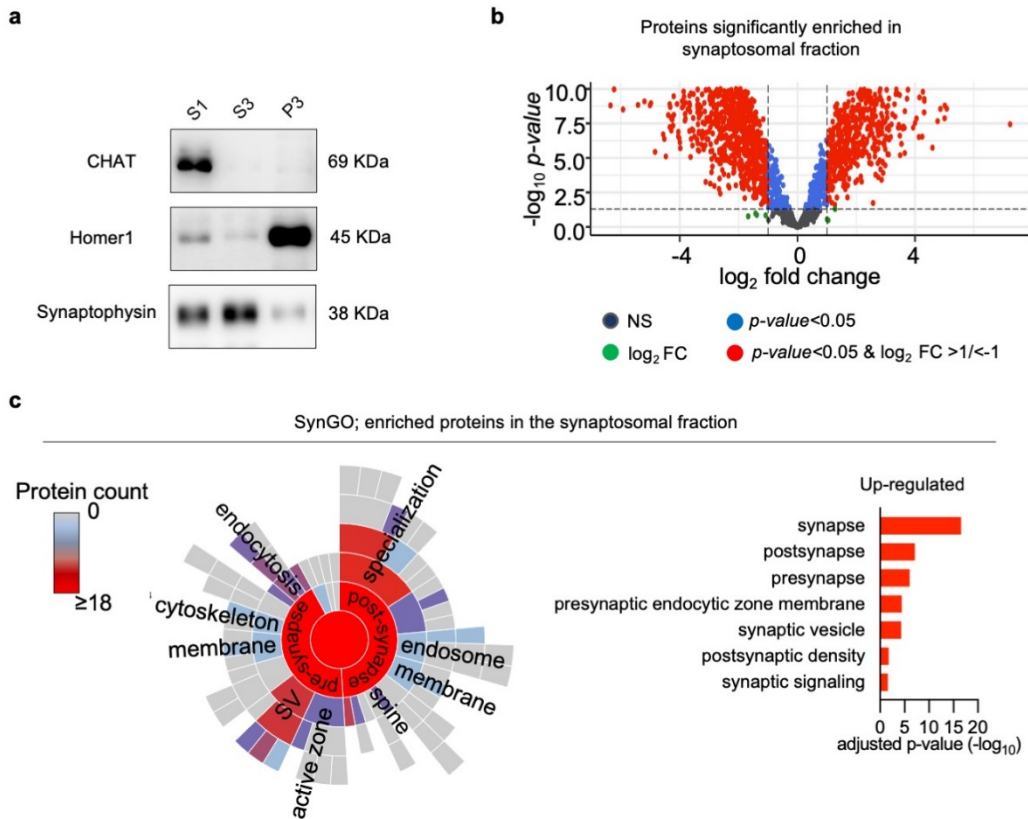

**Supplementary Fig. 7** Validation of synaptic enrichment after fractionation of hiPSC-derived MN samples. **a** Western blot analysis confirms the enrichment of synaptic proteins in the synaptic cytosol (S3) and post-synaptic density (P3) fractions. **b** Volcano plots represent the protein distribution in the synaptosomal fraction and the total extra-nuclear lysate (P1) confirming that the synaptic fractions were indeed significantly enriched in proteins belonging to this neuronal microenvironment. **c** Synaptic enrichment analysis was confirmed using SynGO database, revealing enriched synaptic functional terms such as synaptic vesicle cycle, presynaptic endocytosis and post-synaptic density in the synaptosomal fraction

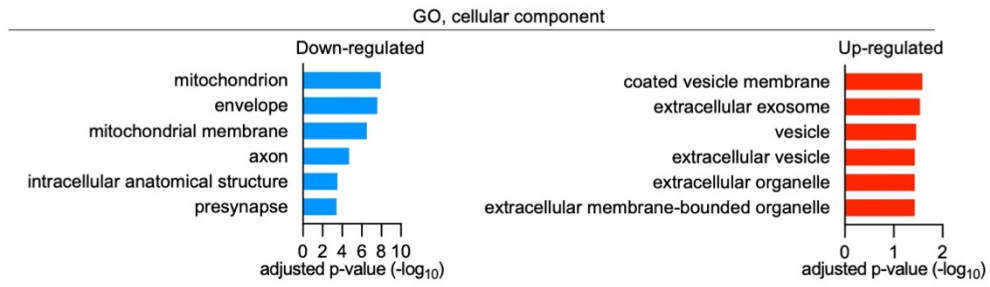

**Supplementary Fig. 8** Enrichment analysis of synaptic proteome from hiPSC-derived MNs from ALS patients. Significantly down- and up-regulated GO (cellular component) terms in ALS based on the synaptome dataset

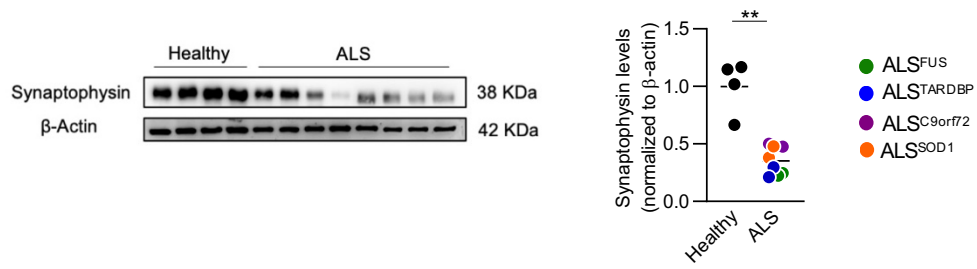

**Supplementary Fig. 9** Confirmation of Synaptophysin down-regulation in hiPSC-derived ALS MNs. Western blot analysis of the presynaptic fraction revealed a significant reduction of SYP levels in all the mutant lines when compared to the four controls, confirming the synaptic proteome results. Welch's *t*-test  $**P < 0.01$ .  $n = 3$  independent cultures

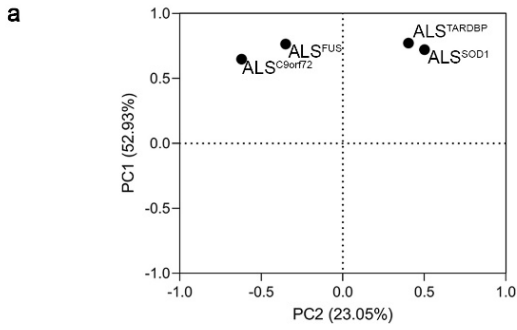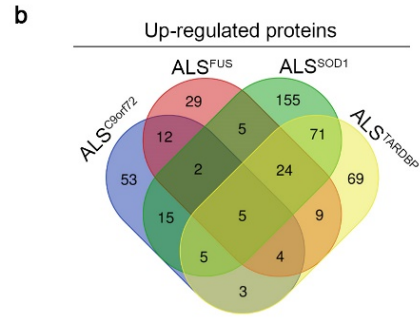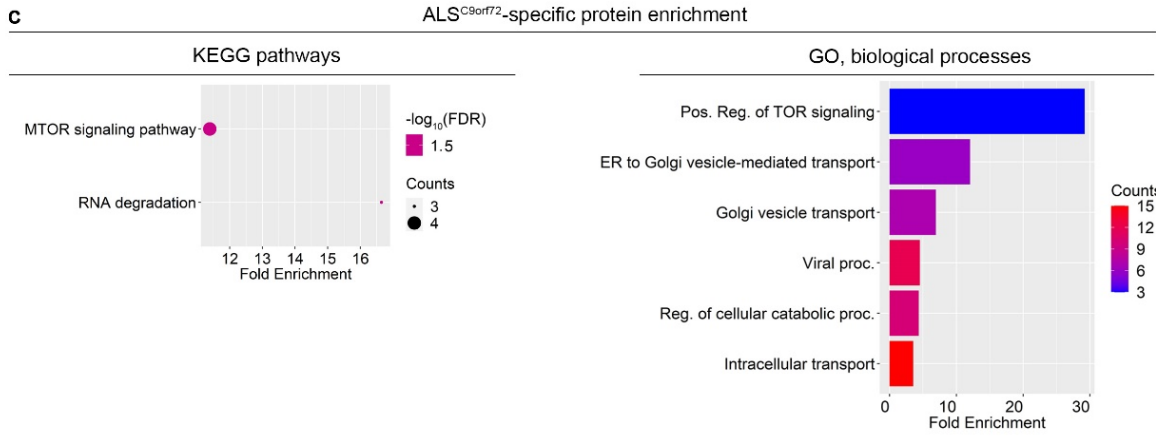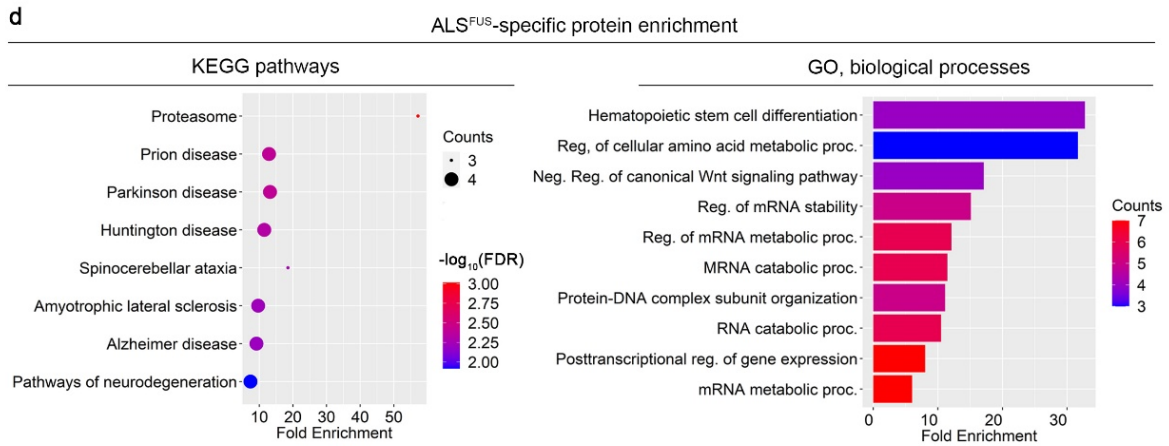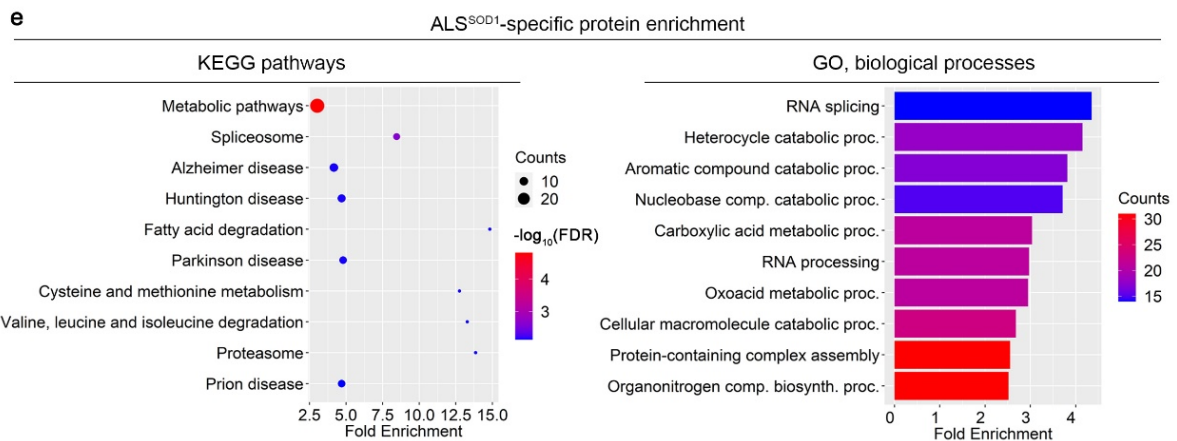

**Supplementary Fig. 10** Enrichment analysis of the ALS subtype-specific up-regulated proteins. **a** Principal component analysis using the control normalized expression values shows the clustering of the different ALS MN cell lines. **b** Venn diagram visualizes the alignment of the mutation-specific up-regulated proteins. Enrichment analysis shows the top KEGG pathways and Gene Ontology (GO) terms using *C9orf72*- (**c**), *FUS*- (**d**) and *SOD1*-specific up-regulated protein IDs (**e**).

**a**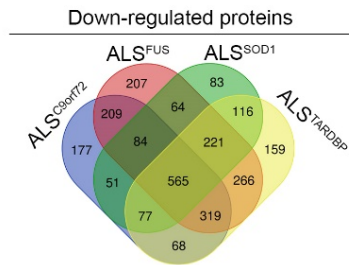**b**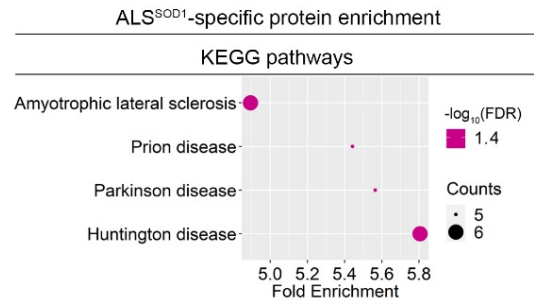**c**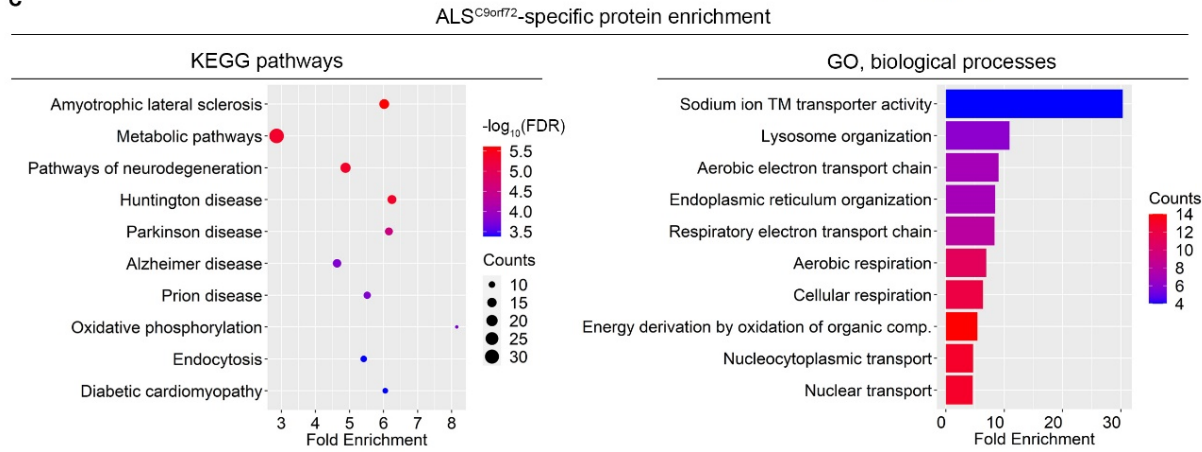**d**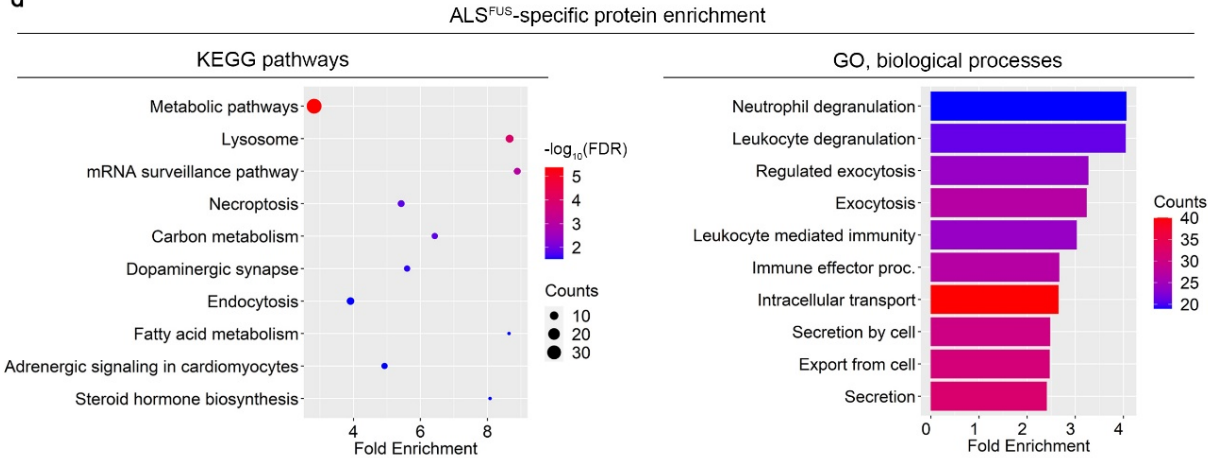**e**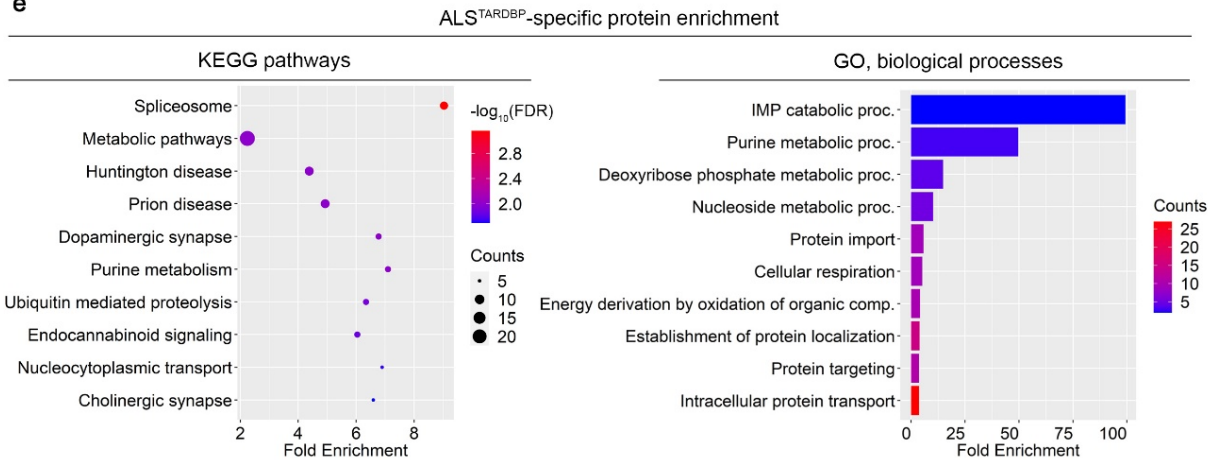



**Supplementary Fig. 11** Alignment and enrichment analysis of the mutant cell line-specific down-regulated proteins. **a** Venn diagram shows the alignment of the ALS genotype-specific down-regulated proteins. Enrichment analysis shows the top KEGG pathways and Gene Ontology (GO) terms of SOD1- (**b**), C9orf72- (**c**), FUS- (**d**) and TARDBP-specific down-regulated protein IDs (**e**).

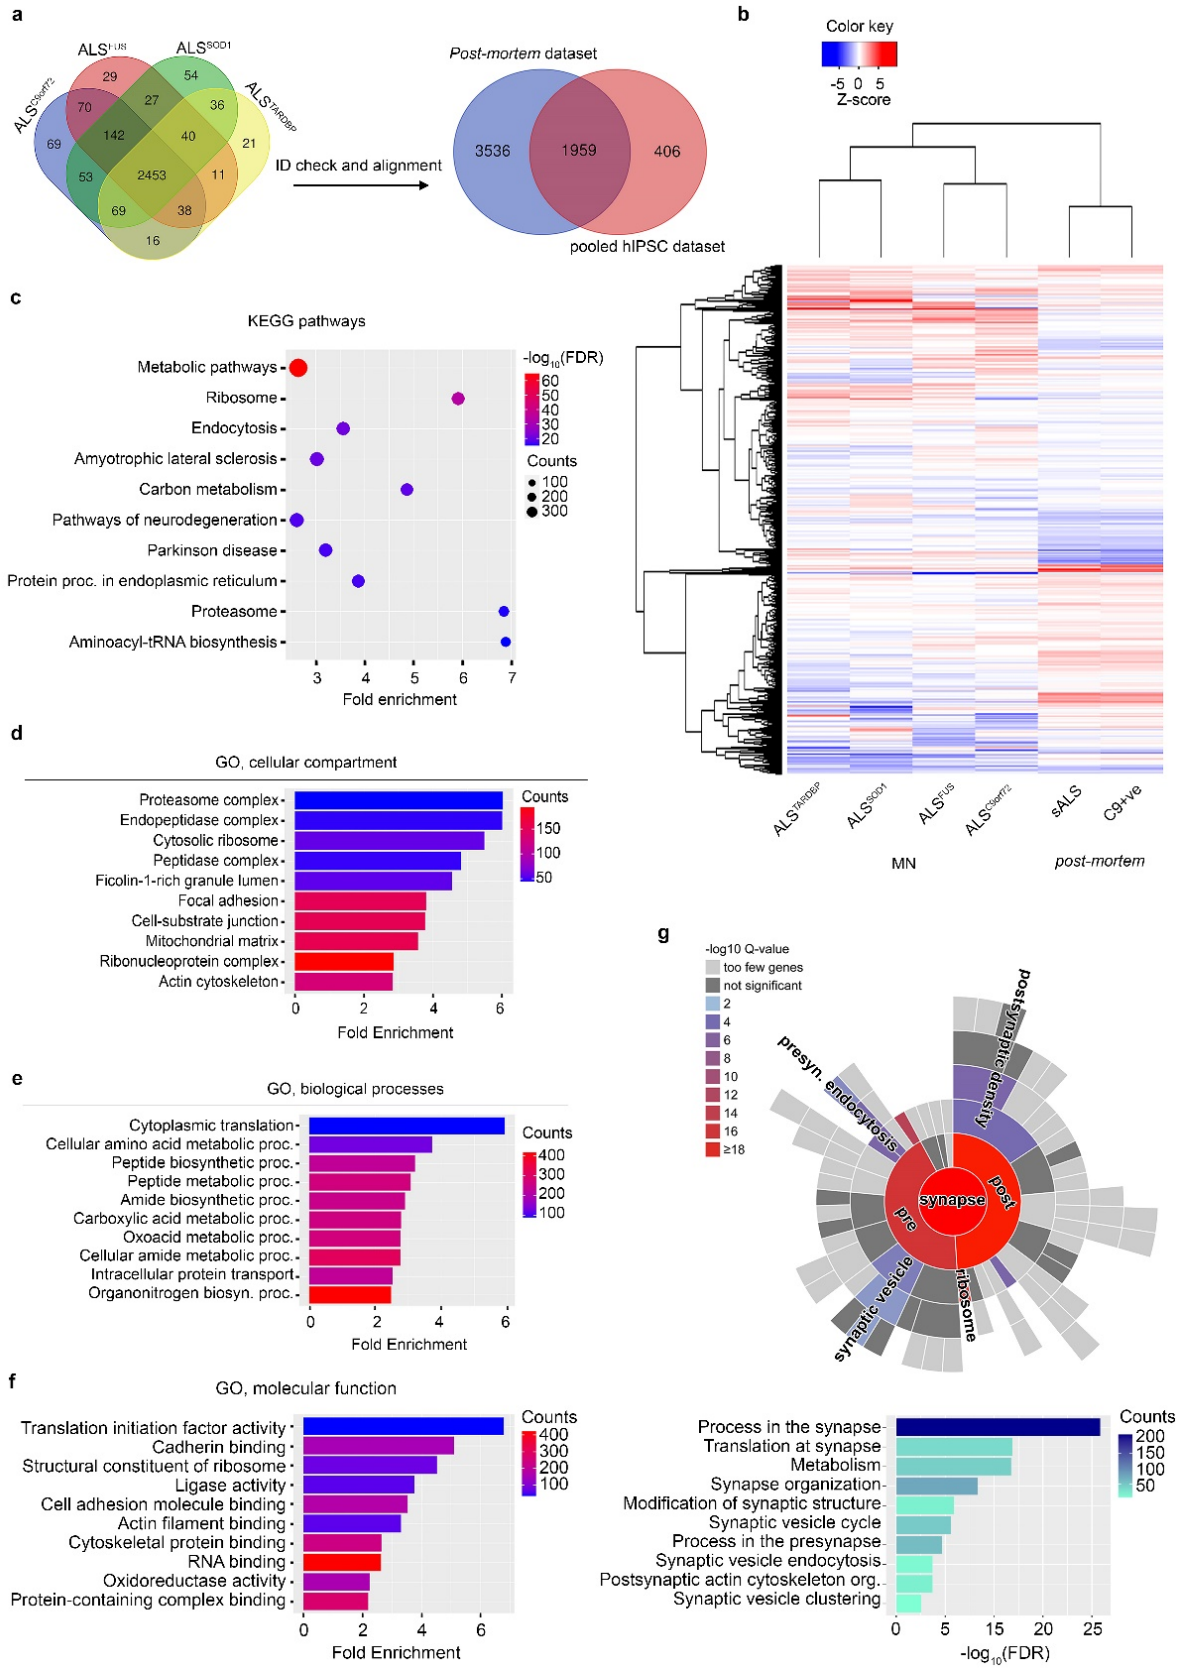

**Supplementary Fig. 12** Investigation of the overlap between ALS hiPSC-derived MNs and post-mortem dataset. **a** Venn diagrams show the filtering and alignment of hiPSC lines and post-mortem dataset. After ID check using only Swiss-Prot protein IDs, 2453 congruent proteins were found between the different ALS cell lines. This dataset was aligned with the human post-mortem proteomics dataset revealing 1959 common proteins visualized by heat map (**b**). **c** Enrichment analysis shows the top 10 KEGG pathways based on fold enrichment, sorted by  $-\log_{10}(\text{FDR})$  and gene counts (dots size). **d-f** Top 10 Gene Ontology (GO) terms demonstrate the most enriched functional and cellular clusters. **g** Subsynaptic analysis by SynGO database present the most enriched synaptic terms including synaptic vesicle cycle and endocytosis.

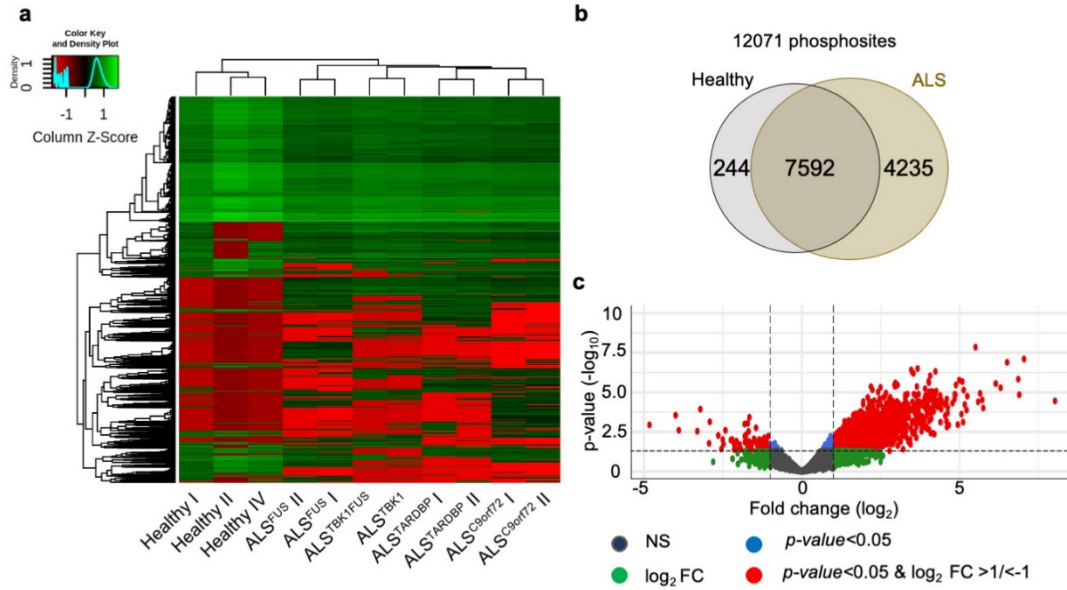

**Supplementary Fig. 13** Total phosphoproteome analysis in hiPSC-derived MNs. **a** Heatmap based on all the unique phosphosites identified in human MN. Already at the level of total phosphoproteome, a separation between controls and ALS mutants is detectable. The 4 subgroups of patients cluster according to their mutated gene. **b** Venn diagram shows the distribution of the 12071 detected non-redundant phosphosites in both experimental groups. **c** Volcano plot represents the significantly down- and up-regulated phosphosites in the ALS group

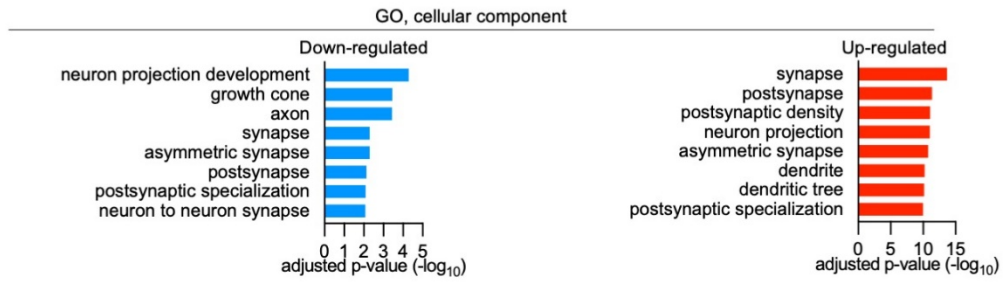

**Supplementary Fig. 14** Most enriched cellular fractions in ALS phosphoproteome. Significantly down- and up-regulated GO (cellular component) terms in ALS based on the phosphoproteome dataset

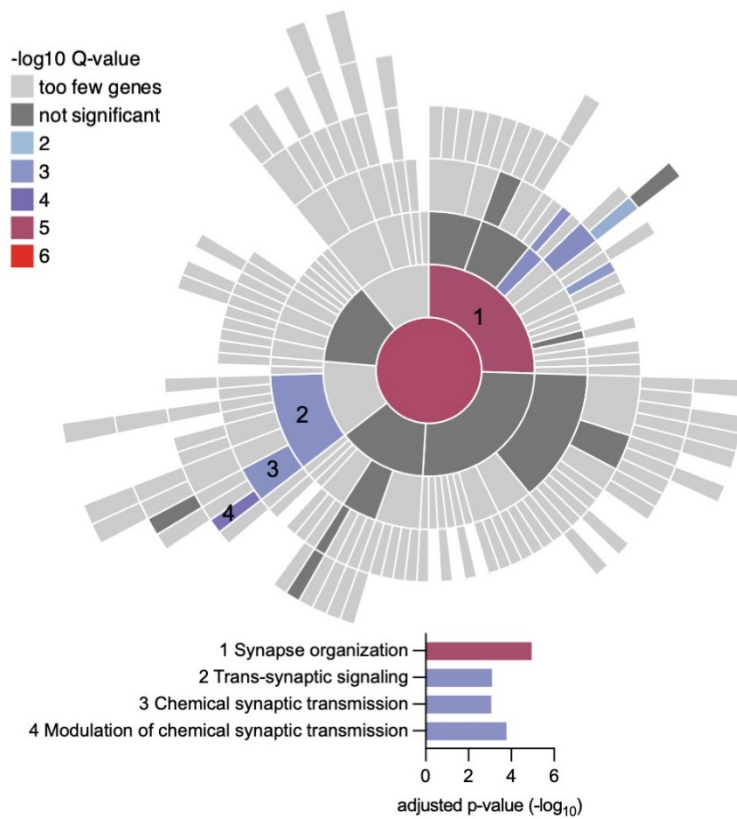

**Supplementary Fig. 15** Phosphoproteome analysis confirms synaptic alterations in ALS. SynGO analysis based on the phosphoproteome dataset revealing a significant enrichment in pathways linked to synapse organization, signaling and transmission

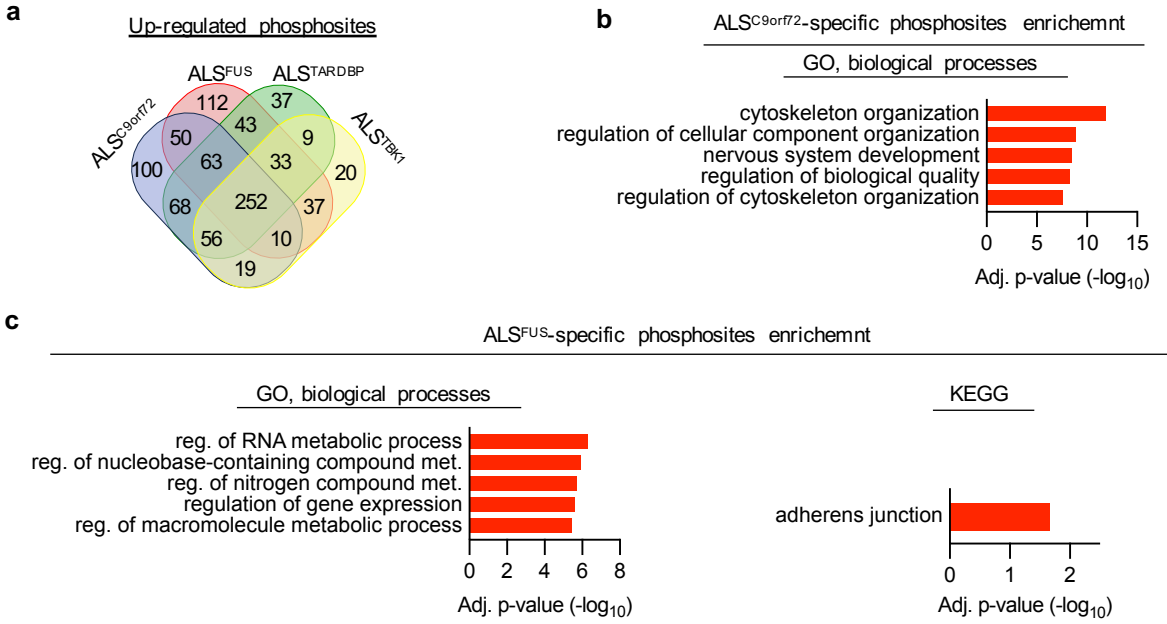

**Supplementary Fig. 16** Alignment and enrichment analysis of the mutant cell line-specific up-regulated phosphosites. **a** Venn diagram shows the alignment of the ALS genotype-specific down-regulated proteins. Enrichment analysis shows the top KEGG pathways and Gene Ontology (GO) terms of C9orf72- (**b**) and FUS-mutant cultures (**c**).

**a**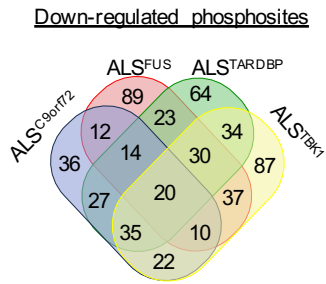**b**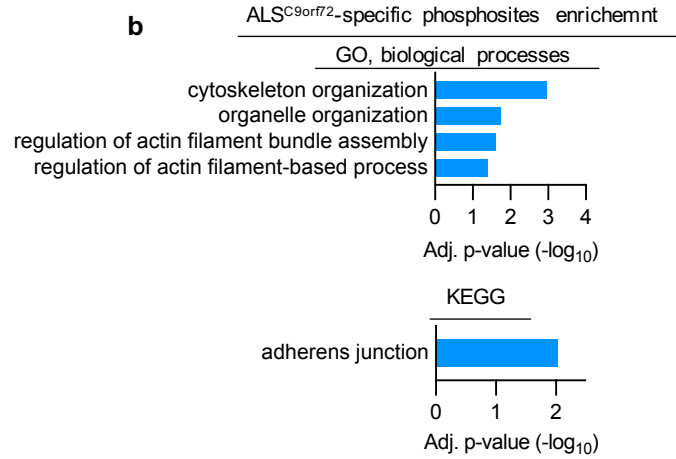**c**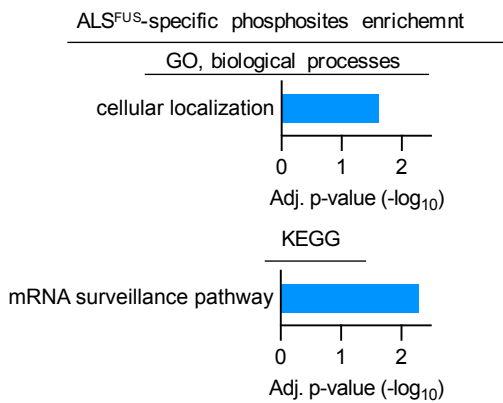**d**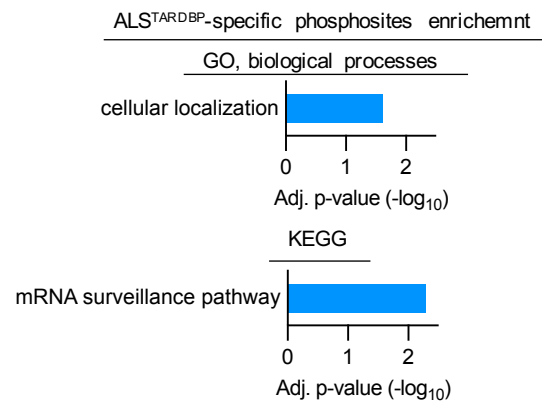**e**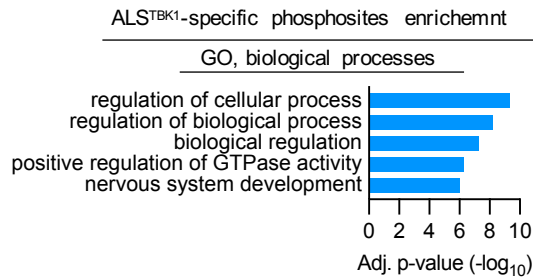

**Supplementary Fig. 17** Alignment and enrichment analysis of the mutant cell line-specific down-regulated phosphosites. **a** Venn diagram shows the alignment of the ALS genotype-specific down-regulated proteins. Enrichment analysis shows the top KEGG pathways and Gene Ontology (GO) terms of C9orf72- (**b**), FUS- (**c**), TARDBP- (**d**) and TBK1-mutant cultures (**e**).



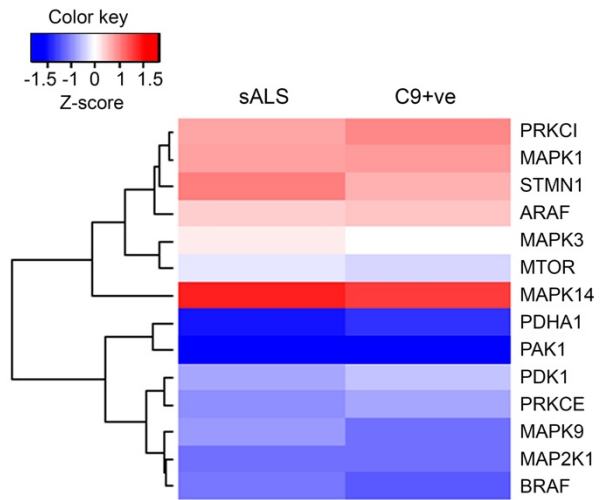

**Supplementary Fig. 18** Altered kinase levels in the ALS synaptoneurosomes. The kinases predicted to be responsible of the altered phosphoproteome in hiPSC-derived ALS MNs are altered in the *post-mortem* synaptic fraction of sALS and C9+ve samples.

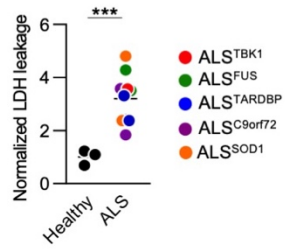

**Supplementary Fig. 19** Increased cell stress and apoptosis in ALS MNs. Cultures of mutant MNs show significantly higher levels of leaked LDH at DIV 42 in comparison to healthy controls. Welch's *t*-test \*\*\* $P < 0.001$ .  $n = 3$  independent cultures

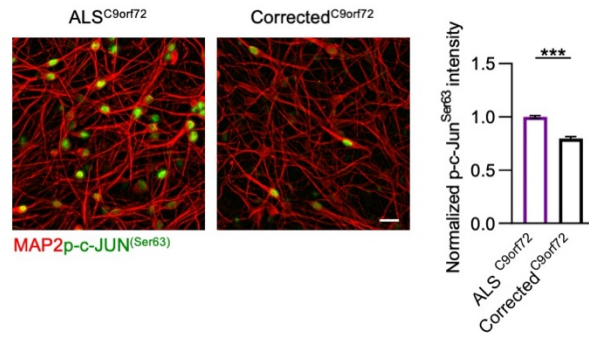

**Supplementary Fig. 20** Decreased phosphorylation levels of phospho-cJun<sup>Ser63</sup> in corrected C9orf72-mutant MNs. Correcting the pathogenic *GGGGCC* expansion in a C9orf72-mutant line using CRISPR-Cas9 significantly reduces phospho-cJun<sup>Ser63</sup> intensity compared to C9orf72-mutant MN. Graph shows mean±SEM. Data analysed by Mann-Whitney test \*\*\* $P < 0.001$ .  $n = 3$  independent cultures. Scale bar: 25  $\mu\text{m}$

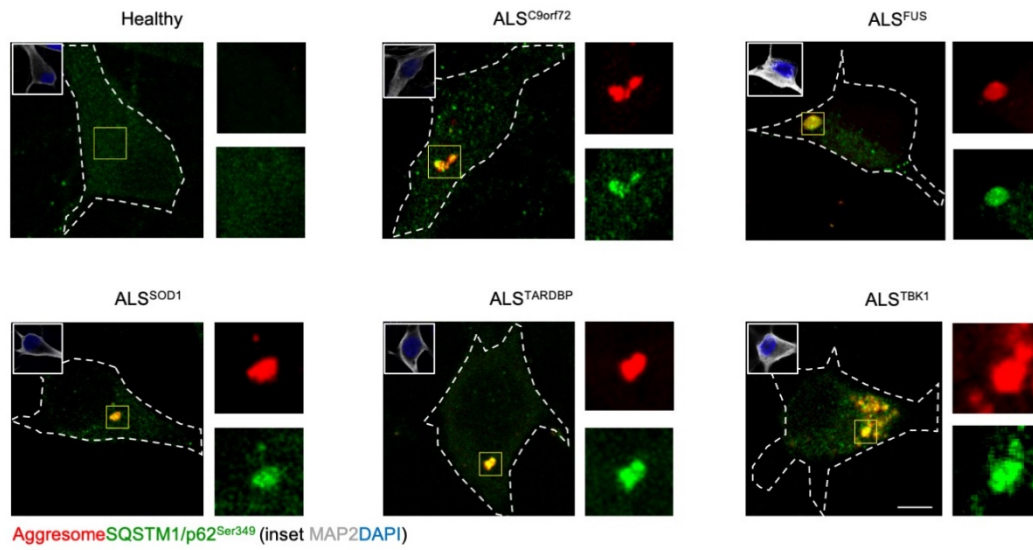

**Supplementary Fig. 21** Aggregate accumulation in hiPSC-derived ALS MNs. Representative confocal images showing colocalization of phospho-SQSTM1/p62<sup>Ser349</sup> within cytotoxic aggresomes in the presence of pathogenic mutations. Scale bar: 5  $\mu$ m. Dashed line represents the cell soma

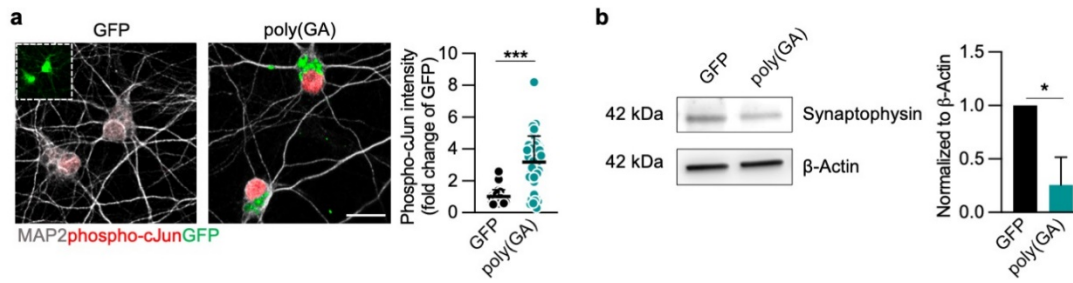

**Supplementary Fig. 22** Overexpression of poly(GA) in primary neurons recapitulates alterations similar to those observed in human ALS MNs. **a** Overexpression of poly(GA) significantly increases the levels of nuclear phospho-cJun<sup>Ser63</sup> compared to EGFP-positive cells. Mann-Whitney test \*\*\* $P < 0.001$ .  $n = 3$  independent cultures. Scale bar: 20  $\mu\text{m}$ . **b** Poly(GA)+ cortical neurons have significantly lower levels of SYP in comparison to EGFP-expressing neurons. Graph represents mean  $\pm$  SEM and data were analyzed by Mann-Whitney test \* $P < 0.05$ .  $n = 3$  independent cultures

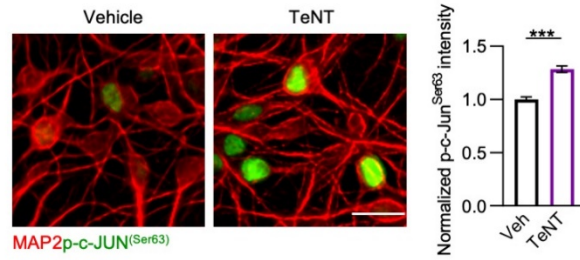

**Supplementary Fig. 23** Pharmacological inhibition of synaptic vesicle release increases phospho-cJun<sup>Ser63</sup> levels in Healthy cultures. Inhibition of synaptic vesicle release after 24 hours of treatment with tetanus neurotoxin (TeNT) significantly increases the levels of phospho-cJun<sup>Ser63</sup> in Healthy MNs compared to vehicle-treated ones. Graph show mean±SEM analysed by Mann-Whitney test \*\*\* $P < 0.001$ .  $n = 3$  independent treatments performed with the Healthy I line. Scale bar: 25  $\mu\text{m}$

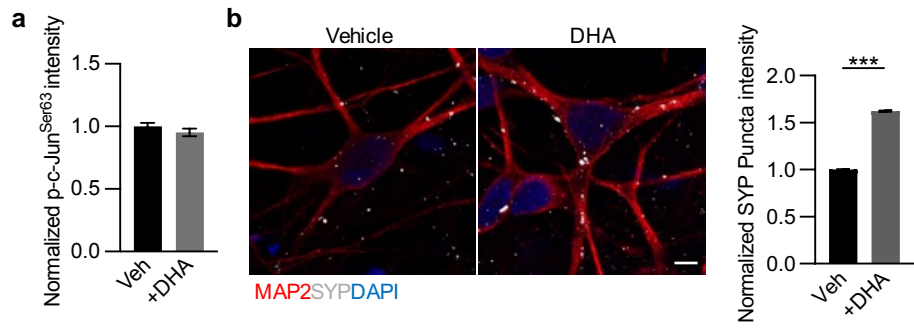

**Supplementary Fig. 24** DHA treatment in Healthy hiPSC-derived MNs cultures. **a** DHA treatment does not modify the level of p phospho-cJun<sup>Ser63</sup> in control cultures. **b** Treatment of control MN with DHA significantly increases SYP levels in comparison to vehicle-treated cultures. Graph shows mean±SEM. Mann-Whitney test \*\*\* $P < 0.001$ .  $n = 3$  independent treatments performed with the Healthy I line. Scale bar: 5  $\mu\text{m}$

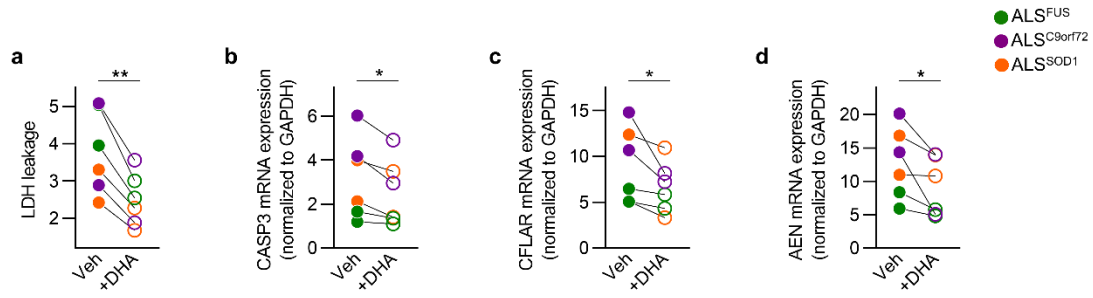

**Supplementary Fig. 25** DHA treatment reduces apoptosis in ALS MNs. **a** Treatment with DHA exerts a beneficial effect in mutant cultures by significantly decreasing the levels of leaked LDH in comparison to vehicle-treated cultures. Paired t-test  $**P < 0.01$ .  $n = 3$  independent treatments with each hiPSC line. **b-d** Single tube qPCR experiments showing the down-regulation of JUN apoptotic targets *CASP3*, *CFLAR* and *AEN* in ALS MNs after DHA treatment. Paired t-test  $*P < 0.05$ .  $n = 3$  independent treatments with each hiPSC line.
